1 **Curiosity is associated with enhanced**  
2 **tonic firing in dorsal anterior cingulate cortex**  
3

4  
5 Maya Zhe Wang and Benjamin Yost Hayden  
6

7 Department of Neuroscience,  
8 Center for Magnetic Resonance Research, and  
9 Center for Neuroengineering

10 University of Minnesota, Minneapolis MN 55455  
11

12  
13  
14 Contact Information:

15 Maya Zhe Wang  
16 Department of Neuroscience & Center for Magnetic Resonance Research  
17 University of Minnesota, Minneapolis MN 55455  
18 Email: [mayawangz@gmail.com](mailto:mayawangz@gmail.com)  
19

20 **Keywords**

21 Observing behavior, entropy, anterior cingulate cortex, orbitofrontal  
22 cortex, curiosity  
23

24 **Acknowledgements:**

25 We thank Tommy Blanchard for help in designing the task, and Marc  
26 Mancarella and Meghan Castagno for assistance in data collection. We  
27 appreciate close help from Ethan Bromberg-Martin for help in designing  
28 the task, and developing some of the analysis approaches we used here.  
29 This research was supported by an NIH R01(DA038106) to BYH.  
30  
31  
32  
33  
34

## ABSTRACT

35  
36  
37       Disparity between current and desired information, known as information gap, is  
38 an important driver of information-seeking and curiosity. To gain insight into its neural  
39 basis, we recorded responses of single neurons in dorsal anterior cingulate cortex (dACC)  
40 while rhesus macaques performed a task that induces and quantifies demand for  
41 information. We find that enhanced firing rates in dACC before the start of a trial predict  
42 a stronger bias towards information-seeking choices. Following choices of uninformative  
43 options, firing rates are tonically enhanced until information is delivered. The level of  
44 enhancement observed is correlated on a trial-by-trial basis with the value assigned to the  
45 prospective information. Finally, variation in this tone is positively correlated with  
46 receptiveness to new information, as inferred by preference changes on subsequent trials.  
47 These patterns are not observed in a complementary dataset collected in orbitofrontal  
48 cortex (OFC), suggesting these effects reflect at least somewhat anatomically localized  
49 processing.

50

## INTRODUCTION

51

52

53

54

55

56

57

58

59

60

61

62

63

64

65

66

67

68

69

70

71

Ignorance is not always bliss. A decision-maker who is uncertain about the outcomes of their potential actions and choices may have a desire to probe the environment for information that can provide the missing knowledge. Indeed, decision-makers may gain utility from doing so, even if the information is neutral or bad (Kidd and Hayden, 2016; White et al., 2019). This fact has motivated scholars to propose that curiosity is motivated in part by an information gap, ego dystonic discrepancy between current and desired information (Golman & Loewenstein, 2015; Gottlieb et al., 2013; Kang et al., 2009; Loewenstein, 1994). In this view, lack of information is a special drive state that can be sated by obtaining information. The information gap is the central theoretical structure linking curiosity to psychology and ultimately to neuroscience (Golman & Loewenstein, 2018; Gottlieb & Oudeyer, 2018; Kidd & Hayden, 2016; Marvin & Shohamy, 2016; van Lieshout et al., 2018).

Despite its value in motivating psychological hypotheses, the neuronal basis of the information gap remains to be identified (Cervera et al., 2020). We hypothesized that the brain computes and represents the demand for information within a circumscribed circuit. Several factors motivated us to hypothesize that the dorsal anterior cingulate cortex (dACC) would be one such region. The dACC is associated with monitoring both cognitive and visceral (i.e. basal drive state) variables (Heilbronner & Hayden, 2016a; Morecraft & Van Hoesen, 1998). At least one study has linked activity in dACC to curiosity (Jepma et al., 2012). Neurons in dACC also track - and drive demand for - counterfactual information, suggesting the region may monitor current information gap,

72 and drive information-seeking decisions (Hayden, et al., 2009). Moreover, enhanced  
73 hemodynamic activity in this region is associated with enhanced control, with  
74 specification of control, and with exploratory processes in foraging, which have some  
75 heuristically similarity to information-seeking (Kolling et al., 2012; Shenhav et al., 2013;  
76 Shenhav et al., 2017; Smith et al., 2019; Heilbronner and Hayden, 2016). Finally, activity  
77 in this region is directly associated with information-seeking processes, with curiosity *per*  
78 *se* (e.g. Jepma et al., 2012). Given these facts we hypothesized that dACC neurons would  
79 track current level of information gap.

80 Here we made use of the curiosity tradeoff task that we developed previously  
81 (Blanchard et al., 2015). This task is based a version of the observing task designed for  
82 macaques (Bromberg-Martin & Hikosaka, 2009; Roper, 1999). On each trial, subjects  
83 choose between two gambles with different stakes and then wait 2.25 seconds until they  
84 are rewarded. One option provides information about the resolution of the gamble  
85 immediately; the other option maintains the mystery for the delay period. Monkeys are  
86 reliably information-seeking in this task, meaning they will sacrifice a small amount of  
87 water to obtain advance (Blanchard et al., 2015). We have proposed that this task satisfies  
88 an operational definition of curiosity (Wang & Hayden, 2019). Specifically, we believe  
89 that information-seeking choices in this task reflect a demand for information reflective  
90 of an information gap. Moreover, we believe that choice of an uninformative option leads  
91 to a state in which information is lacking and therefore maintains an information gap. In a  
92 previous study, we reported the responses of neurons in orbitofrontal cortex (OFC)  
93 during this task, although we did not examine either of these epochs (Blanchard et al.,

94 2015). For the present study, we compared this dataset to a second dataset, collected at

95 the same time as the first but not previously analyzed, recorded in dACC.

96

97  
98  
99

## RESULTS

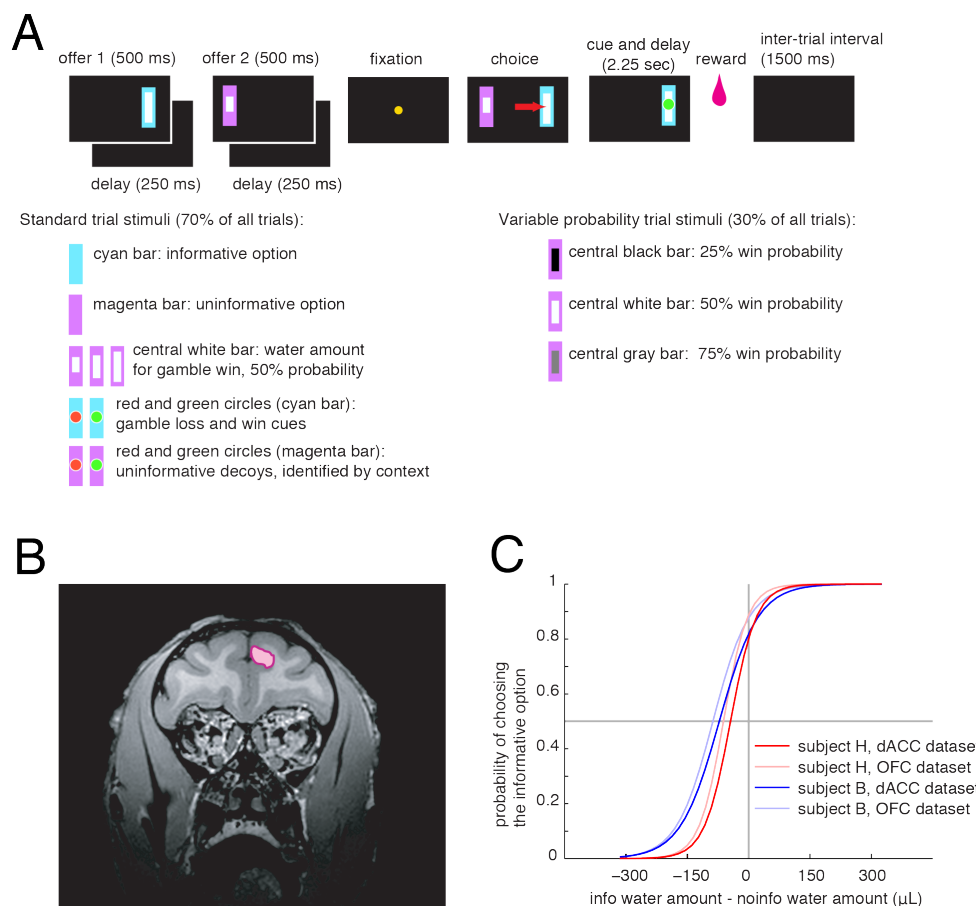

100  
101  
102  
103  
104  
105  
106  
107  
108  
109

**Figure 1.** Task, anatomy, and basic behavior. **A.** Cartoon illustrating the structure of the task (above) and different possible stimuli (below). **B.** Coronal section of subject H showing the location of recording sites in dACC. **C.** Behavior of two subjects on standard trials in dACC/OFC datasets (darker/lighter colors). Likelihood of choosing informative option as a function of relative value between the two options. Leftward shift of curves indicates that both subjects preferred the informative option on standard trials.

### Behavior: macaques value advance information about gamble outcomes

110  
111  
112

We used a task we called the *curiosity tradeoff task* that we developed previously (Blanchard et al., 2015; see also Bromberg-Martin and Hikosaka, 2009, which motivated the design of our study).

113            *Standard trials* (70% of trials): each gamble offers a 50% chance of a juice  
114 reward of varying amount (**Figure 1**). Regardless of choice, any reward is given 2.25  
115 seconds later. Behavior of macaques in this task has been described in detail (Blanchard  
116 et al., 2015; Bromberg-Martin & Hikosaka, 2009; Bromberg-Martin, Matsumoto, &  
117 Hikosaka, 2010). Indeed, these two macaques were the same subjects used in our  
118 previous study and behavior here is, not surprisingly, nearly identical (Blanchard et al.,  
119 2015, **Figure 1C**). As in our previous study, both subjects preferred informative cues.  
120 Subjects B and H chose the gamble with higher stakes on 78.2% and 83.0% of trials (both  
121 are greater than chance,  $p < 0.0001$ , binomial test). Subjects B and H chose the more  
122 informative option on 67.8% and 69.4% of trials respectively (both  $p < 0.0001$ , binomial  
123 test). When the two options had equal stakes, both subjects preferred information (B:  
124 78.8%, H: 78.1%). Indifference points (**Methods**) for the two subjects were 76  $\mu$ l (B) and  
125 51  $\mu$ l (H). This indifference point identifies the subjective value of information.

126            *Variable probability trials* (30% of trials): These trials were not used in our  
127 previous study and were introduced here as an additional control. On 30% of trials  
128 (randomly interleaved), subjects chose between two uninformative options that have the  
129 same stakes (225  $\mu$ l juice). The probability was either 25%, 50%, or 70% and was the  
130 same for both offers on the same trial. On these trials, subjects chose the left and right  
131 option roughly equally (subject B: 55.1% left; subject H: 49.8% left). Any observed  
132 left/right bias did not depend on probability (regression of left choice against the three  
133 probability conditions, subject B:  $p = 0.44$ , subject H:  $p = 0.18$ ).

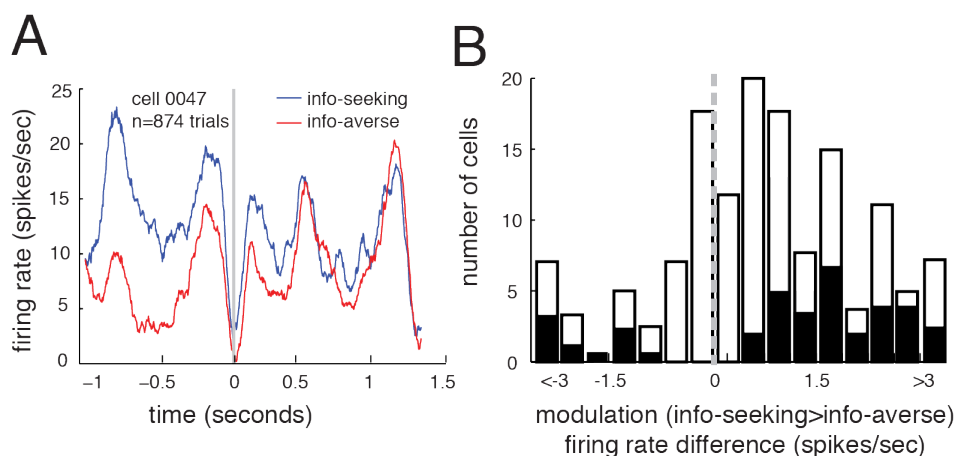

134  
135 **Figure 2.** Pre-trial correlation between demand for information and firing  
136 rates in dACC neurons. **A.** Responses of an example neuron showing higher  
137 firing rates on info-seeking trials vs. info-averse trials (these categories are  
138 determined by average behavior, see main text). **B.** Histogram of pre-trial  
139 differences between info-seeking and info-averse trials. Neurons with individually  
140 significant effects are shown in black.

141

142

### **Enhanced pre-trial activity in dACC predicts information-seeking choices**

143

144 We recorded responses of 151 single neurons in dACC (n=88 in subject B and  
145 n=63 in subject H). We collected an average 551 trials per cell, and a minimum of 500  
146 trials. We reasoned that if demand for information reflects a drive state, it would have  
147 neuronal signatures before trial onset. We therefore considered the 500 ms period  
148 immediately preceding the presentation of the first offer. We divided all trials into two  
149 categories, (1) ones that were more information-seeking than average, (2) ones that were  
150 less information-seeking than average. These categories were defined in terms of the  
151 average subjective value the subject placed on information as inferred by the choice made  
152 excluded from this analysis (**Methods**).



153 For the example neuron shown in **Figure 2A**, pre-trial activity was higher on  
154 *relatively information-seeking* trials ( $p=0.004$  Student's t-test). Responses of 27.2% of  
155 neurons ( $n=41/151$ ) differentiated the two trial types (this proportion is significant,  
156  $p<0.001$ , binomial test, **Figure 2B**). Of these, 75.6% ( $n=31/41$ ) showed enhanced firing  
157 (this proportion is significant,  $p=0.0015$ , binomial test). Responses of 26.4% of neurons  
158 ( $n=40/151$ ) differentiated information-seeking trials relative to neutral trials (as  
159 determined by t-test, this proportion is significant,  $p<0.001$ , binomial test). Of these  
160 neurons, 70.0% ( $n=28/40$ ) were enhanced (this proportion is significantly different from  
161 0.5,  $p=0.0166$ , binomial test). Thus, increased pre-trial firing predicts information-  
162 seeking choices. Indeed, the average ensemble firing rate for all neurons (including non-  
163 significantly modulated ones) was 0.71 spikes/sec greater preceding information-seeking  
164 trials than neutral trials and 0.42 spikes/sec lower on information-averse trials than on  
165 neutral ones (both these differences are significant,  $p<0.001$ , t-test). These numbers  
166 represent a relatively high proportion (17.32% and 10.24%, respectively) of the baseline  
167 pre-trial firing rate (that is, 4.1 spikes/sec).

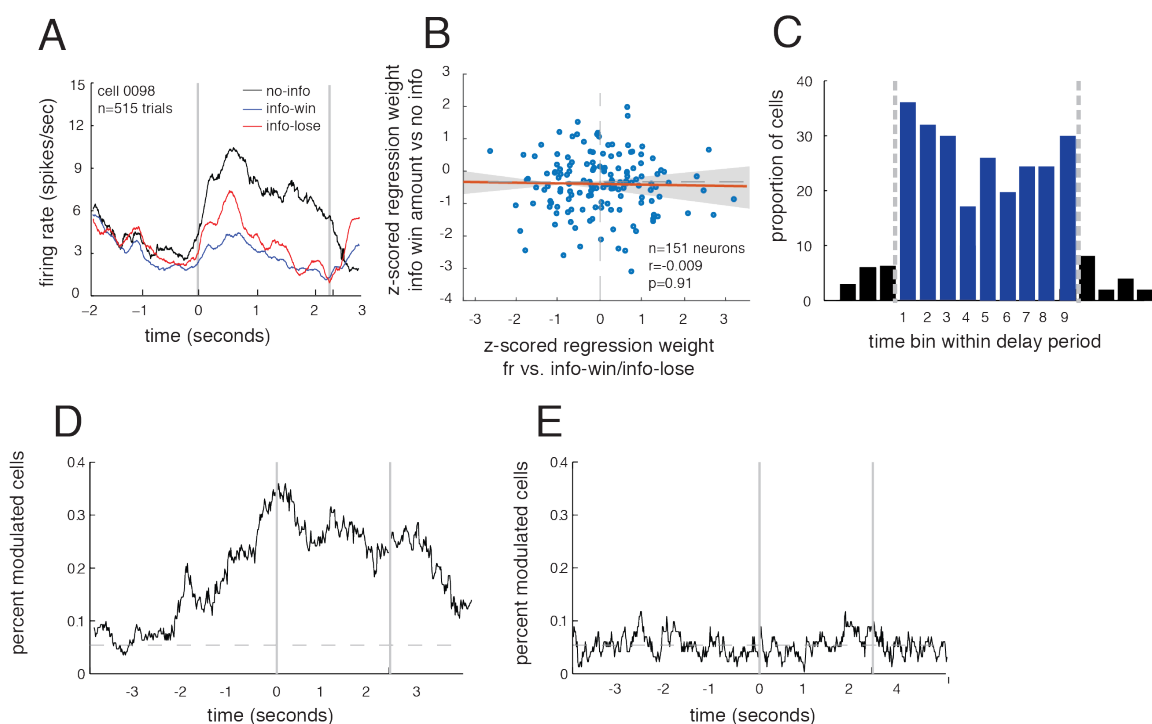

168  
169

170

**Figure 3.** Delay period response modulation for no-info trials. Time 0 in A, D, and E indicates the start of delay period. **A.** Responses of an example neuron on trials in which no upcoming reward information is given during the delay (no-info trials, black) and trials in which this information is given (info trials, blue and red). Responses on no-info trials are systematically enhanced, a pattern that is common in the population. **B.** Scatter plot of regression weights for info vs. no info trials (y-axis) against info-win vs. info-lose (x-axis). These variables are not correlated, suggesting that codes for information gap and reward are unrelated. **C.** We divided data into nine time bins and found significant modulation in each one, suggesting, on no-info trials, the modulation is sustained across the delay period. **D.** Plot of proportion of cells significantly modulated by info vs. no-info status, using a sliding 500 ms window. Horizontal dashed line indicates chance level (i.e., 5%). **E.** Plot of proportion of cells significantly modulated by the win- and lose-related cues on no-info trials (when they are non-predictive). We see no measurable effect.

175  
176  
177  
178  
179  
180  
181  
182  
183  
184

185

186

### Informational uncertainty tonically enhances firing rates in dACC

187

188

189

On trials in which the subject chose the no-info option (no-info trials), subjects proceeded to enter a state of temporally extended uncertainty. During this period, the subject did not know whether a reward would occur for 2.25 seconds. We next asked how

190 neurons would respond to this sustained lack of uncertainty resolution. We reasoned that  
191 if uncertainty has no special implications, then the firing rate may resemble a weighted  
192 average of the firing rates associated with the two possible contrapositive outcomes  
193 (learning that a large/no reward is impending). On the other hand, if the status of lacking  
194 information in this task is somehow special, it may lead to a firing rate outside the range  
195 of the other two, and, in particular, systematic enhancement in firing across the long  
196 period the uncertainty is maintained.

197 For a typical neuron (**Figure 3A**), responses on no-info trials are enhanced (2.9  
198 spikes/sec and 3.2 spikes/sec,  $p < 0.01$  in both cases, Student's t-test). In our entire sample,  
199 firing rate on no-info trials was different from the average firing rate on both types of info  
200 trials in a substantial number of neurons (46.3%,  $n = 70/151$ ,  $p < 0.001$ , binomial test). This  
201 modulation appears to last the entire waiting period. We divided the 2.25 second waiting  
202 period into nine equal 250 ms time bins. In all nine bins, a significant proportion of cells  
203 encoded the variables for info vs. no info. Even the bin with the lowest proportion had  
204 18%,  $n = 28$  cells, which is greater than chance ( $p < 0.001$ , binomial test).

205 We next asked whether neurons that showed enhancement in one of these epochs  
206 were more likely to be the ones that showed enhancement in another. (That is, whether  
207 these effects reflect a sustained enhancement in some neurons, or periodic short bursting  
208 in more neurons). We reasoned that if the same set of cells was involved in signaling  
209 information from one bin to another, then we would see a positive correlation in their  
210 unsigned regression weights (i.e. absolute value of regression weights, see Azab &  
211 Hayden, 2017 for details). For every pair of bins ( $n = 72$  comparisons, i.e. 9 time bins x 8

212 other time bins), the cells involved were more overlapping than chance (correlation was  
213 significant, average  $r=0.29$ ,  $p<0.05$  in all individual cases).

214 We next considered the average effect of informational status on aggregate (grand  
215 average) firing rate. We found that the average firing rate on all no-info trials (8.22  
216 spikes/sec) for all neurons (including non-significantly modulated ones) was greater than  
217 on info-trials (5.97 spikes/sec; this difference is significant,  $p<0.001$ , Student's t-test).  
218 The population of significantly modulated cells was positively biased, meaning more  
219 individual neurons showed an increase in firing than showed a decrease (74.3%,  $n=52/70$ ,  
220  $p<0.001$ , binomial test).

221 Note that this average positive deflection is unlikely to reflect a sustained version  
222 of the bias the predicted information-seeking choices (see previous section). That bias led  
223 to greater firing before info trials, whereas the delay period modulation showed the  
224 reverse pattern. Thus, any firing rate hysteresis would presumably have reduced our  
225 measured effects, not spurred a false positive.

226

### 227 **Delay period enhancement is greater on high information-demand trials**

228 In a previous study using this task, we found that the value of information  
229 (willingness to pay) rises with stakes of the chosen option (Blanchard et al., 2015). These  
230 results indicate that demand for information is higher on higher stakes trials (i.e. trials on  
231 which the subjects are in suspense about a higher valued gamble). Overall, responses of  
232 21.9% of cells ( $n=33/151$ ) were modulated by the stakes during the no-info delay period;  
233 the majority (72.7%,  $n=24/33$ ) showed an enhancement (this bias is significant,

234  $p=0.0135$ , binomial test). Indeed, the average firing of the population was greater in the  
235 top stakes tercile than in the bottom stakes tercile (difference in the entire population,  
236 1.32 spikes/sec,  $p<0.001$ , Student's t test). Nonetheless, the firing rate in the bottom  
237 tercile was greater than responses in either info-win or info-lose conditions (difference in  
238 the entire population, 1.91 spikes/sec,  $p<0.01$ , Student's t test).

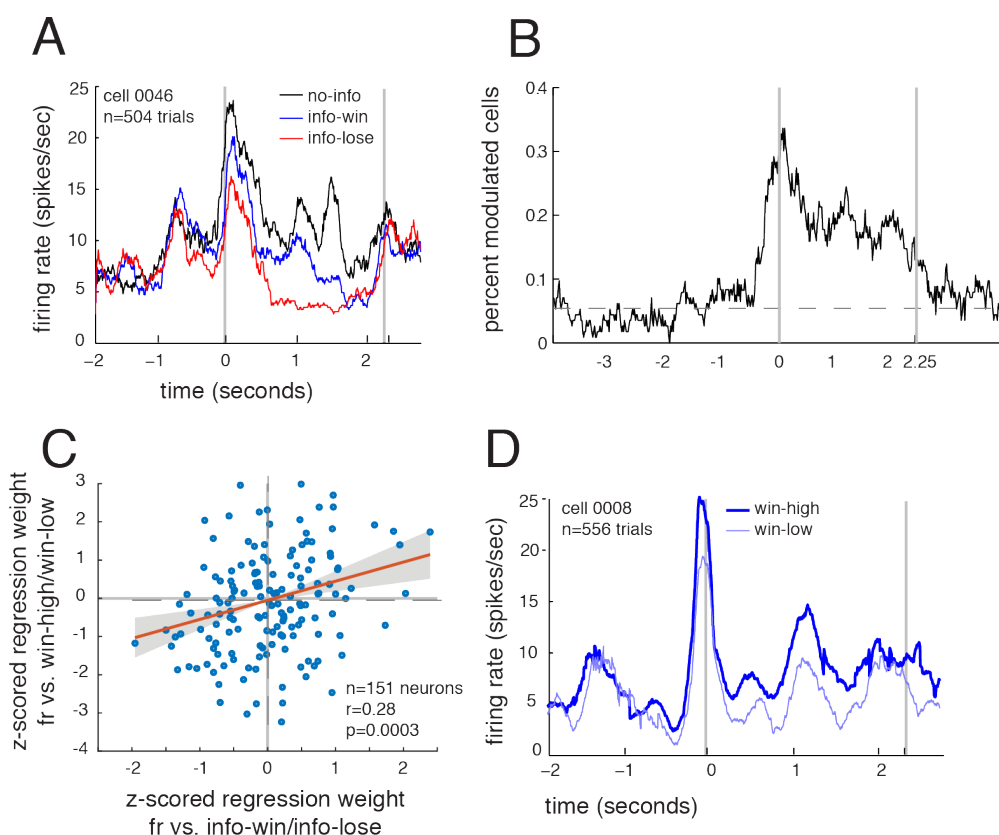

239 **Figure 4. Neuronal encoding of upcoming rewards. A.** Responses of an  
240 example neuron during the delay period (starting at time 0 on the graph) on info-  
241 win (blue) and info-lose (red) trials. Info-win and info-lose trials are significantly  
242 different throughout the course of the delay (0 to 2.25 seconds). Firing rates on  
243 no-info trials (black) are also shown, for reference. **B.** Proportion of cells whose  
244 responses significantly modulated by the difference between info-win and info-  
245 lose using a sliding 500 ms window. Horizontal dashed line indicates chance  
246 level (i.e., 5%). **C.** Scatter plot showing regression weights for info-win-high vs.  
247 info-win-low (y-axis) against info-win / info-lose (x-axis). The positive correlation  
248 indicates that dACC neurons use correlated codes for the two value variables. **D.**

250 Responses of an example cell to info-win trials when the stakes are high (thick  
251 line) and low (thin line).

252

253 **Tonic firing rates in dACC encode upcoming reward information**

254 Enhancement on no-info trials may be a consequence of reward encoding. For

255 example, perhaps it is unpleasant to wait in suspense, or, conversely, it may be pleasant

256 to wait in anticipation. We thus leveraged our ability to perform within-task

257 characterization of reward sensitivity for each neuron. **Figure 4A** shows the choice-

258 aligned responses of an example neuron separated by trial type, no-info (black), info-win

259 (blue), and info-lose (red). The format is the same as in **Figure 3A**. For this neuron,

260 responses following info-win trials were tonically higher than responses following info-

261 loss trials (red vs. blue line, average difference, 3.6 spikes/sec,  $p < 0.01$ , t-test). This

262 pattern was typical of neurons in the sample (**Figure 4B**). Tonic changes in firing rate

263 across the epoch were observed in 41% ( $n=61/151$ ) of neurons depending on the win-loss

264 status of the trial. This bias did not show a directionality; 47.5% ( $n=29/61$ ) showed an

265 enhancement; the bias is not significant ( $p=0.80$ , binomial test).

266 Neurons did not just encode win vs. loss. They also encoded specific reward

267 volume anticipated. For the neurons in **Figure 4D**, the average firing rate was higher on

268 info-win trials with larger than average rewards (thick line) than with smaller than

269 average rewards (thin line, difference, 2.1 spikes/sec,  $p=0.009$ ). On info-win trials,

270 responses of 29.8% of neurons ( $n=45/151$ ) encoded the stakes of the anticipated reward

271 (regression of firing rate against size of anticipated reward). This bias was also not

272 directional (19 positive and 26 negative,  $p=0.37$ , binomial test). The neural coding

273 pattern, namely strength and direction, used by dACC neurons for the win-loss bias was

274 closely correlated with that the reward volume effect, suggesting that this effect reflects a  
275 generic reward encoding (correlation of tuning indices for the two dimensions,  $r=0.31$ ,  
276  $p<0.001$ ). This correlation indicates that, within dACC, there is a general code for  
277 anticipated reward - that is win vs. loss uses the same coding format as amount won on  
278 win trials. In any case, this result suggests that the lack of correlation between codes for  
279 information gap and for reward vs. no reward (see above and **Figure 2A**) is not simply  
280 and artifact of noise. (And indeed, that correlation,  $r=-0.02$  is significantly lower than this  
281 one, Fisher  $r$ -to- $z$ ,  $z=-2.97$ , two-tailed  $p=0.003$ , see below).

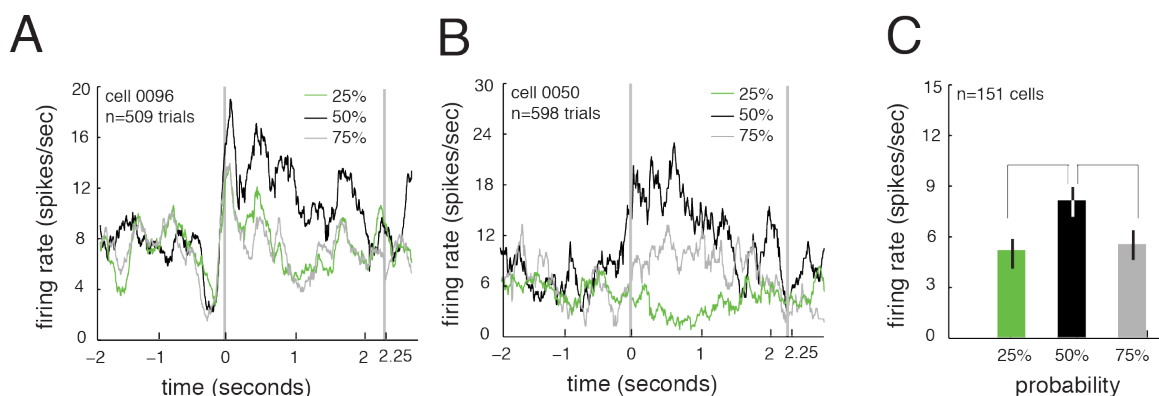

282 **Figure 5.** Data from variable probability trials. **A. and B.** Responses of two  
283 example neurons on *variable probability trials*. For both neurons, responses were  
284 greater on 50% trials than they were on 25% and 75% trials, suggesting the  
285 neurons is more concerned with entropy than it is with expected value. Time 0  
286 refers to the start of the delay period. **C.** Grand average of responses for the  
287 population on variability probability trials. Responses of the ensemble are greater  
288 on 50% than on either 25% or 75% trials.

289  
290  
291

### Controlling for confounds with reward and arousal in dACC

292 Subjects' willingness to pay for information suggests it has an intrinsic value. We  
293 therefore wondered whether the tonic firing rate enhancement associated with lack of  
294 information is an artifactual consequence of reward or reward anticipation coding. We  
295 reasoned that if the information gap induced enhancement were an artifactual

296 consequence of reward or reward anticipation coding, then we should see the neural  
297 coding pattern for information gap and reward related variables to be significantly  
298 similar. Otherwise, information gap evokes a differentiable pattern than do reward related  
299 variables in dACC. To test this idea, we therefore computed an *info-gap coefficient* (the  
300 linear term of the regression coefficient for firing rate against no-info vs info) and two  
301 reward indices for each neuron, one related to info-win vs. info-lose (*win-lose coefficient*)  
302 and one related to the size of the anticipated reward on the info-win trials (*win-amount*  
303 *coefficient*, see **Methods**).

304 The correlation between the info-gap coefficient and the two reward indices was  
305 not significantly different from zero in either case (win-lose coefficient:  $r=-0.02$ ,  $p=0.59$ ;  
306 win amount coefficient:  $r=-0.033$ ,  $p=0.36$ ). Because this lack of effect is difficult to  
307 interpret - it may reflect noise - we next estimated sample noise using a previously  
308 developed cross-validation technique, Blanchard et al., 2015). The correlations we  
309 observed within sample for info-gap coefficient with the two reward coefficients were  
310 both significantly greater than zero ( $r=0.67$  and  $r=0.38$ , respectively,  $p<0.01$  in both  
311 cases). They were also significantly greater than the observed correlations (differences  
312 were  $p<0.001$  in both cases, bootstrap test), indicating that noise was not a limiting factor  
313 and indicating that our observed correlation was significantly less than the value we  
314 would have observed had the true correlation been 1.0. These results suggest that  
315 information gap and arousal (both reward-related coefficients) evoke unrelated neural  
316 response patterns and thus the effect of information gap cannot be simply explained away  
317 by arousal.



318 It is also worth noting that the modulation observed on no-info trials does not  
319 appear to reflect the low level features of the stimuli; on info and no-info trials, the same  
320 two cues were presented, but they had either reward-predictive or reward-irrelevant  
321 meaning, depending on context (**Figure 3E**). On no-info trials, dACC neurons did not  
322 encode the color of the decoy cue (5.3% of cells did so,  $n=8/151$ ,  $p=0.85$ ).

323 To gain additional perspective on the potential confound with arousal, we  
324 included a new trial type. On variable probability trials (30% of all trials), subjects chose  
325 between identical offers. These trials had either 25%, 50%, and 75% stakes and a  
326 medium reward. Responses of two example neurons are shown in **Figures 5A and 5B**.  
327 These neurons showed greater firing on 50% trials than on the other two trial types.  
328 Overall, 52.3% of neurons ( $n=79/151$ ) showed a significant difference for the conditions  
329 (ANOVA test on individual neurons).

330 The example neurons are typical - we found that on these trials, neurons  
331 differentiated 25% from 50% (difference for all neurons: 3.46 spikes/sec,  $p<0.001$ ), and  
332 50% from 75% (difference for all neurons: 2.68 spikes/sec,  $p<0.001$ ), although they did  
333 not differentiate 25% from 75% (difference: 0.39 spikes/sec,  $p=0.34$ ). Note that these  
334 analyses reflect control for multiple comparisons. This pattern suggests that neurons  
335 encode entropy (sometimes called uncertainty), rather than expected value. In other  
336 words, the most parsimonious explanation of the factors driving neural responses is  
337 “amount of information available.” To formally test this idea, we compared linear and  
338 quadratic models; we found that the quadratic model fit better in more of the condition-

339 selective neurons (n=38/79 for quadratic and 6/79 for linear fit, see **Methods** and  
340 Burnham & Anderson, 2010).

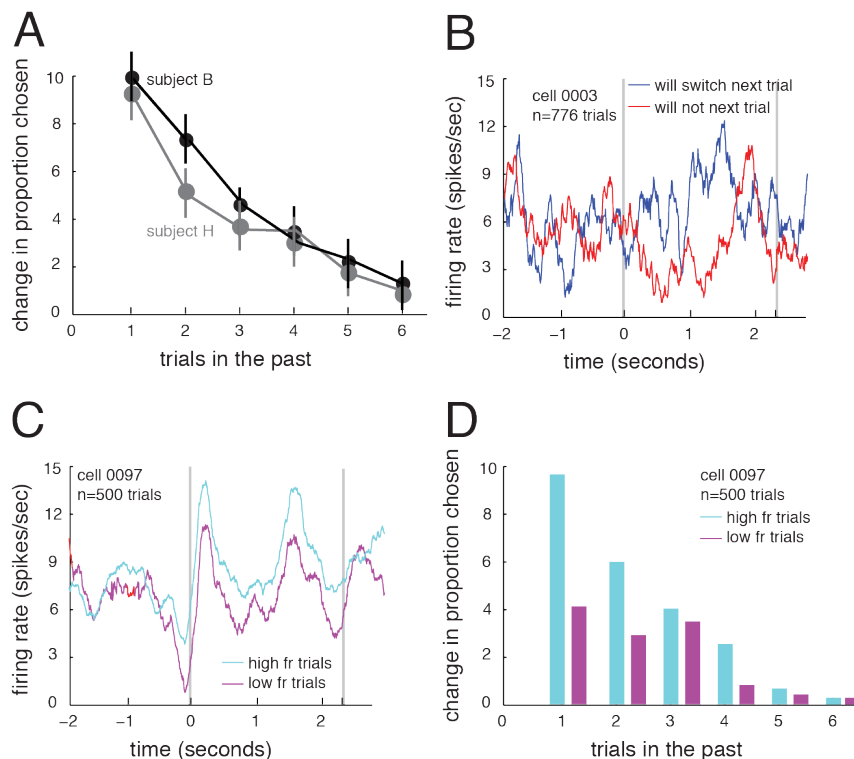

341  
342

343 **Figure 6.** Data related to adjustment and likelihood of changing strategy. 0  
344 point on X axis in A-C reflect the start of delay period. **A.** Subjects switch sides  
345 more often following gambling losses than gambling wins; this effect persists 3-4  
346 trials. **B.** Plot of firing rate of an example cell showing different firing rates on on-  
347 info trials (i.e. controlling for information status and reward status) separated by  
348 whether the subject will switch on the next trial. **C.** Plot of an example cell in high  
349 and low firing rate trials (note that this effect, while significant, is a consequence  
350 of our analysis). Time zero indicates start of delay period. **D.** On higher firing rate  
351 trials for the neuron shown in panel B, subjects are more likely to adjust behavior  
352 on subsequent trials.

353  
354  
355

### Variations in dACC firing rate predict likelihood of changing strategy in

356 response to outcomes

357 We wondered if the firing rate enhancement we saw correlates with readiness to  
358 learn. We have previously investigated the effects of risky outcomes on behavioral  
359 adjustments in some detail (Hayden et al., 2009; Hayden et al., 2011). For present  
360 purposes, the key idea is that switching – whether or not it is beneficial – is driven by  
361 attention to recent outcomes, so that variability in propensity to switch reflects variability  
362 in receptivity to recent outcomes.

363 Here, we find that following wins, subjects are more likely to choose the same  
364 side (left vs right). Specifically, relative to losses, on wins, subject B showed a 9.6%  
365 increased likelihood of repeating the rewarded side and subject H showed a 10.0%  
366 increase (these numbers, while small, are significantly greater than 0,  $p < 0.001$ , binomial  
367 test, **Figure 6A**). These effects are observable as far out as 4 trials later. Gamble wins  
368 changed preference at a statistically significant level for subject B (3.5% increase,  
369  $p = 0.0288$ ) and for subject H (3.8% increase,  $p = 0.0446$ ).

370 We next asked how these trial-to-trial adjustment effects correspond to variations  
371 in firing rate. **Figure 6B** shows the delay period firing rate of an example neuron on no  
372 info trials. This neuron showed enhanced firing rate for info-gap and this firing rate  
373 predicted choice switch on the next trial. **Figure 6C** shows the responses of an example  
374 neuron on no-info trials, separated into higher and lower than average firing rates, after  
375 regressing out stakes. For this neuron, responses were 1.81 spikes/sec higher on higher  
376 firing rate trials ( $p = 0.019$ , t-test; note that this difference is pre-ordained by the analysis).  
377 **Figure 6D** then shows the adjustment pattern for this session on both trial types. This  
378 overall pattern was also observed in the population. Specifically, we performed a linear

379 regression of firing rate in the window against side switch (binary variable, 1 for switch, -  
380 1 for no-switch ), including additional factors for stakes and past win/lose. Responses of  
381 22.5% (n=34/151) of neurons show a correlation with switching, after regressing out  
382 other variables; 76.4% are positive (n=26/34, this proportion is significant,  $p=0.0029$ ,  
383 binomial test). We also performed a linear regression of firing rate in the window against  
384 strategy switch (binary variable), including additional factors for stakes and past  
385 win/lose. We find that responses of 12.5% of neurons (n=19/151) show a significant  
386 correlation with switching, and that 15% are positive (n=15/19,  $p=0.0192$ ).

387

### 388 **Lack of corresponding effects in OFC**

389 We collected complementary results in a study of the OFC (those data are  
390 summarized in Blanchard et al., 2015). In our previous manuscript reporting on that  
391 dataset, our analyses focused on responses to offers, whereas here we consider pre-trial  
392 and delay period effects. Here, we report new results focusing on the pre-trial and delay  
393 period effects in the OFC dataset.

394 Overall, OFC appears very weakly involved in the aspects of the task that strongly  
395 drive dACC responses. In OFC, variability in firing rates pre-trial did not predict  
396 information-seeking decisions. Specifically, 7.96% of neurons (n=9/113 neurons) showed  
397 a firing rate correlation with upcoming choice (not significant,  $p=0.1877$ , binomial test).  
398 This proportion is significantly smaller than the proportion observed in dACC (i.e.  
399 25.8%,  $p<0.001$ , binomial test). The average firing rate before information-seeking trials  
400 was not different than the average firing rate before information-averse trials (difference:

401 0.11 spikes/sec,  $p=0.85$ , t-test). Uncertainty about upcoming rewards did enhance delay  
402 activity in OFC in a significant proportion of neurons, although the proportion was close  
403 to threshold (9.7% of cells,  $n=11/113$ ,  $p=0.0293$ , binomial test). The effect was visible as  
404 an increase in firing as in OFC, although the effect is not significant (difference: 0.44  
405 spike/sec,  $p=0.33$ ), and is significantly lower than the difference in dACC ( $p<0.001$ ,  
406 Student's t-test).

407 Finally, variation in firing rate in OFC did not predict adjustments in behavior.  
408 Specifically, we observed this correlation in 2.65% of cells ( $n=3/113$ ). This proportion is  
409 not significant ( $p=0.29$ , binomial test) and is significantly lower than the proportion  
410 observed in dACC ( $p<0.01$ , binomial test). These results together suggest that OFC does  
411 not strongly predict information seeking behavior or strategy adjustment after the  
412 resolution of epistemic uncertainty.

413

## DISCUSSION

414 Curiosity, a drive for non-instrumental information, clearly has multiple possible  
415 causes. Here, we asked whether those causes can include mitigating the costs associated  
416 with uncertainty. Specifically, we reasoned that remaining in a state of suspense may be  
417 aversive in part because it carries some metabolic costs. To test this hypothesis, we  
418 examined the responses of single dACC neurons during an information tradeoff task  
419 (Blanchard et al., 2015). We find that tonically enhanced firing rates in dACC predict  
420 information-seeking on a trial-by-trial basis, a potential neuronal correlate of the that is a  
421 hypothesized driver of curiosity. Choice of uninformative options leads to a sustained  
422 tonic enhancement in firing that persists until the information is provided. Variability in  
423 this enhancement predicts demand for information and sensitivity of the subject to  
424 outcome information (as assessed by adjustment behavior). These changes were not  
425 observed in OFC, suggesting that our putative enhancements in activity related to  
426 uncertainty are at least somewhat anatomically localized. These observations in turn  
427 endorse the idea that dACC serves in part to accumulate evidence for purposes of guiding  
428 action (Hayden et al., 2011; Hayden and Heilbronner, 2016; Hunt et al., 2018; Kolling et  
429 al., 2012).

430 Neurons in many prefrontal regions encode multiple task variables and, typically,  
431 neural correlates of task variables show a population-level balance of positive and  
432 negative responses. This overall balance likely reflects the fact that positive and negative  
433 deflections can both carry information and, because spiking is costly, there are metabolic  
434 benefits that accrue to a brain that can keep overall spiking levels low regardless of the

435 situation. The putative correlates of information gap we introduce here, in contrast, are  
436 biased towards the positive direction. The bias towards the positive direction suggests the  
437 speculative possibility that encoding these variables imposes metabolic costs on dACC  
438 (Laughlin et al., 1998). These costs did not appear to be counteracted by savings in other  
439 task epochs or in at least one other brain region, the OFC. If the brain is efficient at  
440 managing its own energy budget, it will seek out situations that can reduce spiking. Thus,  
441 our results provide tentative evidence consistent with the hypothesis that demand for  
442 information in this task reflects a demand for energy efficiency.

443         Why would it be costly to do be in a state of suspense? One possibility is that,  
444 when there is information available to learn, the brain's learning systems enter into a state  
445 of *eligibility*, that is, they have the ability to enter into multiple possible knowledge  
446 states. Perhaps these knowledge states are low-energy, but the metastable state in which  
447 multiple knowledge states are possible is higher energy. Another – not incompatible -  
448 possibility is that the brain must enter into a state of enhanced vigilance to monitor  
449 information and that the acquisition of that information allows the brain to reduce its  
450 vigilance and focus on other tasks. Both possible explanations – eligibility and vigilance  
451 have at least some support in the form of previous correlations with dACC activity.

452         We have proposed that this task satisfies an operational definition of curiosity  
453 (Wang & Hayden, 2018; Wang et al., 2018; Wang and Hayden, 2019). An influential  
454 theory of curiosity holds that the demand for information is often driven by an  
455 *information gap* (Golman & Loewenstein, 2015; Gottlieb et al., 2013; Kang et al., 2009;  
456 Loewenstein, 1994; Golman & Loewenstein, 2018; Loewenstein, 1994). That is, a

457 decision-maker's assignment of value to an informative option is caused in part by a  
458 disparity between *desired* and *actual* knowledge. In this view, lack of information is a  
459 drive state that can be sated by information. Consumption of information is rewarding  
460 and lack of it - when desired - is aversive or at least dystonic. The information gap is the  
461 central theoretical structure linking curiosity to psychology and ultimately to  
462 neuroscience (Golman & Loewenstein, 2018; Gottlieb & Oudeyer, 2018; Kidd &  
463 Hayden, 2016; Marvin & Shohamy, 2016; van Lieshout et al., 2018). Our results suggest  
464 that the information gap would have a specific and anatomically localized set of  
465 correlates, and that this set includes dACC and not OFC.

466         Our results have some bearing on debates about the ultimate nature of the dACC.  
467 The function of this region has long been linked to both monitoring and executive  
468 control, as well as to core economic functions (Heilbronner & Hayden, 2016; Morecraft  
469 & Van Hoesen, 1998; Shenhav et al., 2013). Our work is most directly associated with  
470 theories suggesting it is a general-purpose monitor and controller. For example, past work  
471 suggests that dACC monitors conflict, reward outcomes, and other factors that lead to  
472 control (Alexander & Brown, 2011; Azab & Hayden, 2018; Botvinick et al., 1999;  
473 Shenhav et al., 2013; Shenhav et al., 2017; Hillman & Bilkey, 2010; Widge et al., 2019).  
474 Our results, then, suggest a tentative link between executive control and information-  
475 seeking, one that has been generally under-appreciated in the curiosity literature. In  
476 particular, they suggest that curiosity may serve be part of a larger tradeoff that involves  
477 efficient allocation of cognitive resources.



478           Functional neuroanatomy – the identification of region-specific functions is an  
479 important goal of cognitive neuroscience. Some cognitive functions related to economic  
480 choice appear to be broadly distributed (Cisek & Kalaska, 2010; Hunt & Hayden, 2017;  
481 Vickery et al., 2011; Yoo & Hayden, 2018). Our work here, however, indicates that there  
482 is what appears to be a qualitative difference between OFC and dACC (Kennerley et al.  
483 2011; Rudebeck et al., 2006; Hunt et al., 2018). Because we were only able to record in  
484 two regions it is unclear what the full meaning of this difference is - one possibility is that  
485 monitoring is a specialized cingulate function. Another possibility is that OFC is  
486 specialized. Indeed, it has been proposed that OFC encodes a cognitive map of the state  
487 space for the currently relevant task but is not directly involved in changing behavior  
488 (Schuck et al., 2016; Wikenheiser & Schoenbaum, 2016; Wilson et al., 2014). If so, then  
489 it would not be involved in driving the state change or in keeping track of the  
490 environmental variables for potential state update. Our data suggest that dACC is a strong  
491 candidate for these functions, and may thus play a complementary role to OFC in this  
492 process.  
493

## MATERIALS AND METHODS

494

495

496

### Electrophysiological Techniques

497

498

499

500

501

502

503

504

505

506

507

508

509

510

511

512

513

514

515

516

517

518

519

520

521

522

523

### Information tradeoff task

524

525

526

527

528

529

530

531

532

533

534

535

536

537

Two male rhesus macaques (*Macaca mulatta*) served as subjects. All procedures were approved by the University Committee on Animal Resources at the University of Rochester and were designed and conducted in compliance with the Public Health Service's Guide for the Care and Use of Animals. In this manuscript, we discuss two related datasets, one from dACC (the focal dataset) and one from OFC (the comparator dataset). The same subjects were used for both studies; OFC data were collected first and the dACC dataset was collected soon afterwards using the same recording methods.

A Cilux recording chamber (Crist Instruments) was placed over the prefrontal cortex, overlying both area 24 of dACC (as defined in Heilbronner and Hayden, 2016a). This is the same region used in our past studies, e.g. Hayden et al., 2011; Hayden et al., 2009. We also recorded in area 13 of OFC (**Figure 1B**; this is the same region used in these subjects in our past studies, for example Wang and Hayden, 2017 and Slezzer et al., 2016). Position was verified by magnetic resonance imaging with the aid of a Brainsight system (Rogue Research Inc.). Neuroimaging was performed at the Rochester Center for Brain Imaging, on a Siemens 3T MAGNETOM Trio Tim using 0.5 mm voxels.

Single electrodes (Frederick Haer & Co., impedance range 0.8 to 4 mohm) were lowered using a microdrive (NAN Instruments) until waveforms were isolated. Action potentials were isolated on a Plexon system (Plexon, Inc). Neurons were selected for study solely based on the quality of isolation. All collected neurons for which we managed to obtain at least 500 trials were analyzed. Eye position was sampled at 1,000 Hz by an infrared eye-monitoring camera system (SR Research). Stimuli were controlled by a computer running MATLAB (Mathworks) with Psychtoolbox and Eyelink Toolbox. A standard solenoid valve controlled the duration of juice delivery. The relationship between solenoid open time and juice volume was established and confirmed before, during, and after recording.

Two offers were presented in sequence on each trial. The first offer appeared for 500 ms, followed by a 250 ms blank period; a second option appeared for 500 ms followed by a 250 ms blank period. Every trial had one informative and one uninformative option. The order of presentation (informative vs. uninformative) and location of presentation (info-on-left vs. info-on-right) varied randomly by trial. The offered water amount varied randomly for each option (75 to 375  $\mu$ L water in 15  $\mu$ L increments). 70% of trials were standard trials; for the OFC dataset, 100% of trials were standard trials. The remaining trials were variable probability trials; these were interleaved randomly with standard trials.

Each offer was represented by a rectangle 300 pixels tall and 80 pixels wide (11.35 degrees of visual angle tall and 4.08 degrees wide). On standard trials, all options offered a 50% probability of gamble win, to be delivered 2.25 seconds after the choice. Informative gambles (cyan rectangle) indicated that the subject would see a 100% valid cue immediately after choice indicating whether the gamble was won or lost.

538 Uninformative gambles (magenta rectangle) indicated that a random cue would  
539 appear immediately after choice. Valid and invalid cues were physically identical (green  
540 and red circles inscribed on the chosen rectangle). Each offer contained an inner white  
541 rectangle. The height of this rectangle linearly scaled with the water amount to be gained  
542 in the case of a gamble win. Offers were separated from the fixation point by 550 pixels  
543 (27.53 degrees). Subjects were free to fixate upon the offers (and almost always did so).  
544 After the offers, a central fixation spot appeared. Following 100 ms fixation, both offers  
545 reappeared simultaneously and the animal chose one by shifting gaze to it. Then the 2.25  
546 s delay began, and the cue was immediately displayed. Any reward was delivered after  
547 this delay. All trials were followed by a 750 ms inter-trial interval (ITI) with a blank  
548 screen. Previous training history for these subjects at the time of recording included a full  
549 session (several months) with this task, two types of foraging tasks (Blanchard &  
550 Hayden, 2014; Hayden et al., 2011), three gambling/choice tasks (Farashahi et al., 2018;  
551 Heilbronner & Hayden, 2016b; Pirrone et al., 2018), and an attentional task (similar to  
552 the one used in Hayden & Gallant, 2013).

553

#### 554 **Indifference point**

555 We identified when subjects chose informative and non-informative options with  
556 equal probability (50%-50%) and then calculated the difference in stakes (as in water  
557 amount) between the two options. We found that non-informative would have to have  
558 larger stakes than informative ones and this number is 76  $\mu$ l for subject B and 51  $\mu$ l for  
559 subject H. Therefore, the information equates to 76  $\mu$ l of juice reward for subject B and  
560 51  $\mu$ l for subject H.

561

#### 562 **Identifying information-seeking and information-averse trials**

563 For the pre-trial analysis, we divided all trials into three categories, (1) ones that  
564 were more information-seeking than average (information-seeking trials), (2) ones that  
565 were less information-seeking than average (information-averse trials), and (3) ones for  
566 which we could not assign information-seeking with any confidence (neutral trials). First,  
567 we computed an *equivalent value* for the uninformative option by adding a session-wide  
568 average value of information for that subject (i.e. 76  $\mu$ l for subject B and 51  $\mu$ l for  
569 subject H). In effect, this means we computed the average information-seekingness of the  
570 session and then divided trials into ones that were more or less information-seeking than  
571 would be predicted given the average. Trials were placed into the first category if the  
572 subject chose the informative option and its value was less than the equivalent value of  
573 the uninformative option. Trials were placed into the second category if the subject chose  
574 the uninformative option and its equivalent value was less than the value of the  
575 informative option. Note that in many trials, the choice did not provide information  
576 germane to this question, and these were placed into a third class. For example, if the  
577 informative option had a value greater than that of the uninformative one, the subject's  
578 choice would not be classifiable.

579

#### 580 **Model comparison**

581 We used AIC weights to conduct model comparison and select the better fitting model.

582 For model comparison, AIC weights were calculated as following:

583 
$$w_i(AIC) = \frac{\exp(-\frac{1}{2}(AIC_i - AIC_{min}))}{\sum_{r=1}^m \exp(-\frac{1}{2}(AIC_r - AIC_{min}))}, (i = 1, 2, \dots, m). \quad (7)$$

584  $W_i$  is the probability of a model  $M_i$  being the one, among all  $m$  candidate models that is  
585 closest to the true data-generating model (Burnham & Anderson, 2010).

586

## REFERENCES

- 587  
588  
589 Alexander, W. H., & Brown, J. W. (2011). Medial prefrontal cortex as an action-outcome  
590 predictor. *Nature Neuroscience*, *14*(10), 1338–1344. <http://doi.org/10.1038/nn.2921>  
591 Azab, H., & Hayden, B. Y. (2017). Correlates of decisional dynamics in the dorsal  
592 anterior cingulate cortex. *PLoS Biology*, *15*(11), e2003091.  
593 Azab, H., & Hayden, B. Y. (2018). Correlates of economic decisions in the dorsal and  
594 subgenual anterior cingulate cortices. *The European Journal of Neuroscience*, *47*(8),  
595 979–993.  
596 Blanchard, T. C., & Hayden, B. Y. (2014). Neurons in Dorsal Anterior Cingulate Cortex  
597 Signal Postdecisional Variables in a Foraging Task, *34*(2), 646–655.  
598 <http://doi.org/10.1523/JNEUROSCI.3151-13.2014>  
599 Blanchard, T. C., Hayden, B. Y., & Bromberg-Martin, E. S. (2015). Orbitofrontal cortex  
600 uses distinct codes for different choice attributes in decisions motivated by curiosity.  
601 *Neuron*, *85*(3), 602–614. <http://doi.org/10.1016/j.neuron.2014.12.050>  
602 Botvinick, M., Nystrom, L. E., Fissell, K., Carter, C. S., & Cohen, J. D. (1999). Conflict  
603 monitoring versus selection-for-action in anterior cingulate cortex. *Nature Publishing*  
604 *Group*, *402*(6758), 179.  
605 Bromberg-Martin, E. S., & Hikosaka, O. (2009). Midbrain Dopamine Neurons Signal  
606 Preference for Advance Information about Upcoming Rewards. *Neuron*, *63*(1), 119–  
607 126. <http://doi.org/10.1016/j.neuron.2009.06.009>  
608 Bromberg-Martin, E. S., Matsumoto, M., & Hikosaka, O. (2010). Dopamine in  
609 motivational control: rewarding, aversive, and alerting. *Neuron*, *68*(5), 815–834.  
610 <http://doi.org/10.1016/j.neuron.2010.11.022>  
611 Cervera, R. L., Wang, M. Z., & Hayden, B. (2020). Curiosity from the Perspective of  
612 Systems Neuroscience. PsychArxiv.  
613 Cisek, P., & Kalaska, J. F. (2010). Neural mechanisms for interacting with a world full of  
614 action choices. *Annual Review of Neuroscience*, *33*, 269–298.  
615 David, S. V., & Hayden, B. Y. (2012). Neurotree: A collaborative, graphical database of  
616 the academic genealogy of neuroscience. *PloS one*, *7*(10).  
617 Farashahi S, Azab H, Hayden B, Soltani A. (2018) On the flexibility of basic risk  
618 attitudes in monkeys. *J. Neurosci.* *38*, 4383 – 4398. (doi:10.1523/jneurosci. 2260-  
619 17.2018)  
620 Golman, R., & Loewenstein, G. (2015). Curiosity, Information Gaps, and the Utility of  
621 Knowledge. *SSRN Electronic Journal*. <http://doi.org/10.2139/ssrn.2149362>  
622 Golman, R., & Loewenstein, G. (2018). Information gaps: A theory of preferences  
623 regarding the presence and absence of information. *Decision*, *5*(3), 143.  
624 Gottlieb, J., & Oudeyer, P.-Y. (2018). Towards a neuroscience of active sampling and  
625 curiosity. *Nature Reviews. Neuroscience*, *1*.  
626 Gottlieb, J., Oudeyer, P.-Y., Lopes, M., & Baranes, A. (2013). Information-seeking,  
627 curiosity, and attention: computational and neural mechanisms. *Trends in Cognitive*  
628 *Sciences*, *17*(11), 585–593. <http://doi.org/10.1016/j.tics.2013.09.001>  
629 Hayden, B. Y., & Gallant, J. L. (2013). Working memory and decision processes in  
630 visual area v4. *Frontiers in Neuroscience*, *7*, 18.

- 631 <http://doi.org/10.3389/fnins.2013.00018>
- 632 Hayden, B. Y., Pearson, J. M., & Platt, M. L. (2011). Neuronal basis of sequential  
633 foraging decisions in a patchy environment. *Nature neuroscience*, 14(7), 933.
- 634 Hayden, B. Y., Heilbronner, S. R., Pearson, J. M., & Platt, M. L. (2011). Surprise signals  
635 in anterior cingulate cortex: neuronal encoding of unsigned reward prediction errors  
636 driving adjustment in behavior. *Journal of Neuroscience*, 31(11), 4178-4187.
- 637 Hayden, B. Y., Pearson, J. M., & Platt, M. L. (2009). Fictive reward signals in the  
638 anterior cingulate cortex. *science*, 324(5929), 948-950.
- 639 Heilbronner, S. R. (2017). Modeling risky decision-making in nonhuman animals: shared  
640 core features. *Current opinion in behavioral sciences*, 16, 23-29.
- 641 Heilbronner, S. R., & Hayden, B. Y. (2016a). Dorsal Anterior Cingulate Cortex: A  
642 Bottom-Up View. *Annual Review of Neuroscience*, 39(1), annurev-neuro-070815-  
643 013952. <http://doi.org/10.1146/annurev-neuro-070815-013952>
- 644 Heilbronner, S. R., & Hayden, B. Y. (2016b). The description-experience gap in risky  
645 choice in nonhuman primates. *Psychonomic Bulletin & Review*, 23(2), 593-600.  
646 <http://doi.org/10.3758/s13423-015-0924-2>
- 647 Hillman, K. L., & Bilkey, D. K. (2010). Neurons in the rat anterior cingulate cortex  
648 dynamically encode cost-benefit in a spatial decision-making task. *Journal of*  
649 *Neuroscience*, 30(22), 7705-7713.
- 650 Hunt, L. T., & Hayden, B. Y. (2017). A distributed, hierarchical and recurrent framework  
651 for reward-based choice. *Nature Reviews. Neuroscience*, 18(3), 172.
- 652 Hunt, L. T., Malalasekera, W. N., de Berker, A. O., Miranda, B., Farmer, S. F., Behrens,  
653 T. E., & Kennerley, S. W. (2018). Triple dissociation of attention and decision  
654 computations across prefrontal cortex. *Nature neuroscience*, 21(10), 1471-1481.
- 655 Jepma, M., Verdonschot, R. G., Van Steenbergen, H., Rombouts, S. A., & Nieuwenhuis,  
656 S. (2012). Neural mechanisms underlying the induction and relief of perceptual  
657 curiosity. *Frontiers in Behavioral Neuroscience*, 6, 5.
- 658 Kang, M. J., Hsu, M., Krajbich, I. M., Loewenstein, G., McClure, S. M., Wang, J. T.-Y.,  
659 & Camerer, C. F. (2009). The wick in the candle of learning: Epistemic curiosity  
660 activates reward circuitry and enhances memory. *Psychological Science*, 20(8), 963-  
661 973.
- 662 Kennerley, S. W., Behrens, T. E. J., & Wallis, J. D. (2011). Double dissociation of value  
663 computations in orbitofrontal and anterior cingulate neurons. *Nature Publishing*  
664 *Group*, 14(12), 1581-1589. <http://doi.org/10.1038/nn.2961>
- 665 Kolling, N., Behrens, T. E., Mars, R. B., & Rushworth, M. F. (2012). Neural mechanisms  
666 of foraging. *Science*, 336(6077), 95-98.
- 667 Kidd, C., & Hayden, B. Y. (2016). The Psychology and Neuroscience of Curiosity.  
668 *Neuron*, 88(3), 449-460. <http://doi.org/10.1016/j.neuron.2015.09.010>
- 669 Laughlin, S. B., van Steveninck, R. R. de R., & Anderson, J. C. (1998). The metabolic  
670 cost of neural information. *Nature Neuroscience*, 1(1), 36.
- 671 Loewenstein, G. (1994). The psychology of curiosity: A review and reinterpretation.  
672 *Psychological Bulletin*, 116(1), 75.
- 673 Marvin, C. B., & Shohamy, D. (2016). Curiosity and reward: Valence predicts choice and  
674 information prediction errors enhance learning. *Journal of Experimental Psychology:*



- 675        *General*, 145(3), 266.
- 676        Morecraft, R. J., & Van Hoesen, G. W. (1998). Convergence of limbic input to the  
677        cingulate motor cortex in the rhesus monkey. *Brain Research Bulletin*, 45(2), 209–  
678        232.
- 679        Pirrone, A., Azab, H., Hayden, B. Y., Stafford, T., & Marshall, J. A. R. (2018). Evidence  
680        for the speed–value trade-off: Human and monkey decision making is magnitude  
681        sensitive. *Decision*, 5, 129–142. doi 10.1037/dec0000075
- 682        Roper, K. L. E. A. (1999). Observing Behavior in Pigeons: The Effect of Reinforcement  
683        Probability and Response Cost Using a Symmetrical Choice Procedure, 1–20.
- 684        Rudebeck, P. H., Buckley, M. J., Walton, M. E., & Rushworth, M. F. S. (2006). A role  
685        for the macaque anterior cingulate gyrus in social valuation. *Science*, 313(5791),  
686        1310–1312. <http://doi.org/10.1126/science.1128197>
- 687        Schuck, N. W., Cai, M. B., Wilson, R. C., & Niv, Y. (2016). Human Orbitofrontal Cortex  
688        Represents a Cognitive Map of State Space. *Neuron*, 91(6), 1402–1412.  
689        <http://doi.org/10.1016/j.neuron.2016.08.019>
- 690        Shenhav A, Musslick S, Lieder F, et al. (2017). Toward a Rational and Mechanistic  
691        Account of Mental Effort. *Annu Rev Neurosci*. 40: 99–124.
- 692        Shenhav, A., Botvinick, M. M., & Cohen, J. D. (2013). The expected value of control: an  
693        integrative theory of anterior cingulate cortex function. *Neuron*, 79(2), 217–240.
- 694        Sleezer, B. J., Castagno, M. D., & Hayden, B. Y. (2016). Rule encoding in orbitofrontal  
695        cortex and striatum guides selection. *Journal of Neuroscience*, 36(44), 11223–11237.
- 696        Smith, E. H., Horga, G., Yates, M. J., Mikell, C. B., Banks, G. P., Pathak, Y. J., ... &  
697        Sheth, S. A. (2019). Widespread temporal coding of cognitive control in the human  
698        prefrontal cortex. *Nature neuroscience*, 1-9.
- 699        Strait, C. E., Blanchard, T. C., & Hayden, B. Y. (2014). Reward value comparison via  
700        mutual inhibition in ventromedial prefrontal cortex. *Neuron*, 82(6), 1357–1366.  
701        <http://doi.org/10.1016/j.neuron.2014.04.032>
- 702        van Lieshout, L. L., Vandenbroucke, A. R., Müller, N. C., Cools, R., & de Lange, F. P.  
703        (2018). Induction and relief of curiosity elicit parietal and frontal activity. *Journal of*  
704        *Neuroscience*, 38(10), 2579–2588.
- 705        Vickery, T. J., Chun, M. M., & Lee, D. (2011). Ubiquity and specificity of reinforcement  
706        signals throughout the human brain. *Neuron*, 72(1), 166–177.
- 707        Wang, M. Z., & Hayden, B. Y. (2019). Monkeys are curious about counterfactual  
708        outcomes. *Cognition*, 189, 1-10.
- 709        Wang, M. Z., & Hayden, B. Y. (2017). Reactivation of associative structure specific  
710        outcome responses during prospective evaluation in reward-based choices. *Nature*  
711        *Communications*, 8, 15821. <http://doi.org/10.1038/ncomms15821>
- 712        White, J. K., Bromberg-Martin, E. S., Heilbronner, S. R., Zhang, K., Pai, J., Haber, S. N.,  
713        & Monosov, I. E. (2019). A neural network for information seeking. *Nature*  
714        *communications*, 10(1), 1-19.
- 715        Widge, A. S., Heilbronner, S. R., & Hayden, B. Y. (2019). Prefrontal cortex and  
716        cognitive control: new insights from human electrophysiology. *F1000Research*, 8.
- 717        Wikenheiser, A. M., & Schoenbaum, G. (2016). Over the river, through the woods:  
718        cognitive maps in the hippocampus and orbitofrontal cortex. *Nature Reviews*.

- 719            *Neuroscience*, 17(8), 1–11. <http://doi.org/10.1038/nrn.2016.56>  
720        Wilson, R. C., Takahashi, Y. K., Schoenbaum, G., & Niv, Y. (2014). Orbitofrontal cortex  
721            as a cognitive map of task space. *Neuron*, 81(2), 267–279.  
722            <http://doi.org/10.1016/j.neuron.2013.11.005>  
723        Yoo, S. B. M., & Hayden, B. Y. (2018). Economic choice as an untangling of options  
724            into actions. *Neuron*, 99(3), 434–447.  
725
